# Supplementary material for: ALDRESS: A Retrospective Pilot Study to Develop a Pharmacological Causality Algorithm for Drug Reaction with Eosinophilia and Systemic Symptoms (DRESS)
Source: MDPI journal article supplement (doi:10.3390/jcm13092622), 2024-04-29
Supplement: s1 [file s1]

## **MATERIAL AND METHODS**

The authors to give readers additional information about their work have provided this supplementary material.

The reference number corresponds to what is established in the original article

**Table S1. RegiSCAR DRESS validation score <sup>[1s]</sup>**

| Parameter considered                                                                                                                         | The possible manifestations (for each parameter)                                                                                                                                                                      |                                                                                           | Point on RegiSCAR DRESS validation |
|----------------------------------------------------------------------------------------------------------------------------------------------|-----------------------------------------------------------------------------------------------------------------------------------------------------------------------------------------------------------------------|-------------------------------------------------------------------------------------------|------------------------------------|
| FEVER ≥ 38.5 °C                                                                                                                              | PRESENT                                                                                                                                                                                                               |                                                                                           | 0                                  |
|                                                                                                                                              | ABSENT                                                                                                                                                                                                                |                                                                                           | -1                                 |
| LYMPH NODES                                                                                                                                  | Lymphadenopathy (≥ 2 sites, > 1 cm)                                                                                                                                                                                   |                                                                                           | +1                                 |
|                                                                                                                                              | >5% atypical lymphocytes in peripheral smear                                                                                                                                                                          |                                                                                           | +1                                 |
| HEMATOLOGICAL CRITERIA                                                                                                                       | Absolute eosinophil count 700-1.499 cells/mm <sup>3</sup>                                                                                                                                                             |                                                                                           | +1                                 |
|                                                                                                                                              | Absolute eosinophil count >1500 cells/mm <sup>3</sup>                                                                                                                                                                 |                                                                                           | +2                                 |
| SKIN RASH                                                                                                                                    | Maculopapular rash involving >50% of body surface area and does not satisfy features of rash suggestive of DRESS                                                                                                      | Rash not showing 2/4 features suggestive of DRESS (edema, infiltration, purpura, scaling) | -1                                 |
|                                                                                                                                              |                                                                                                                                                                                                                       | Generalized maculopapular rash                                                            | +1                                 |
|                                                                                                                                              | Maculopapular rash and two of the four features among facial edema, rash resolving with psoriasiform desquamation, infiltrated skin lesions and purpuric lesions on areas other than legs                             | Rash not showing 2/4 features suggestive of DRESS (edema, infiltration, purpura, scaling) | +1                                 |
|                                                                                                                                              |                                                                                                                                                                                                                       | Generalized maculopapular rash                                                            | +1                                 |
| INTERNAL ORGAN INVOLVEMENT                                                                                                                   | One internal organ involvement                                                                                                                                                                                        |                                                                                           | +1                                 |
|                                                                                                                                              | Two or more internal organ involvement                                                                                                                                                                                |                                                                                           | +2                                 |
| RESOLUTION                                                                                                                                   | Resolution in > 15 days                                                                                                                                                                                               |                                                                                           | -1                                 |
| EXCLUDING OTHER CAUSES                                                                                                                       | Antinuclear antibody, blood culture, serology of HVA/HBV/HCV, Chlamydia/Mycoplasma. Core 1 if 3 tests on the following were performed and all were negatives: HAV, HBV, HCV, Mycoplasma, Chlamydia, ANA blood culture | None [+] and at least 3 [-]                                                               | +1                                 |
| This classified suspected cases as definite (score 6 and above), probable (score 4 and 5), possible (score 2 and 3), and no DRESS (score <2) |                                                                                                                                                                                                                       |                                                                                           |                                    |

**Table S2. Algorithm for causality assessment of Drug Reaction with Eosinophilia and Systemic Symptoms (DRESS) syndrome, (ALDRESS)**

- 1. Delay from initial drug component intake to onset of reaction (index day)\*:**
  - Compatible (score +2): 1-12 weeks after initiation of treatment \*\*
  - Not fully supported (+1): between 3 -6 months
  - No information (0)
  - Incompatible chronology (−1): onset prior to drug initiation\*\*/>6 months
- 2. Alternative: time to onset from cessation of the drug**
  - ≤ 15 days (except for slowly metabolized chemicals: > 15 days): +1
- 3. Drug notoriety:**
  - Known in the reference guidelines/literature (+2): recorded in the summary of product characteristics, or the adverse drug reaction was found in clinical trials, or the association has been found in cohort studies or in case-control studies.
  - Occasionally known (+1): only found in published case reports.
  - Unknown (0)
  - Unrelated to the drug (−1): presence of confounding variables. Confounding variables appear when the estimate of a measure of association between the drug exposure and health status is distorted by the effect of ≥1 other variables that are also risk factors for the outcome of interest.
- 4. Evaluation of drug withdrawal:**
  - Improvement on withdrawal: (+2)
  - Not withdrawing improves the effect (−2)
  - Drug withdrawal does not improve effect (−2)
  - No information (0)
  - Death or irreversible effect (0)
  - Not withdrawn, improves with specific (immunosuppression) treatment (0)
- 5. Risk factors:**
  - Previous collagen vascular diseases (ankylosing spondylitis, dermatomyositis, polyarteritis nodosa, psoriatic arthritis, rheumatoid arthritis, scleroderma, systemic lupus erythematosus) (+1)
  - Chronic kidney disease for allopurinol (+1)
  - Viral infection in the month prior to DRESS (+1)
  - Genetic risk factor associated with DRESS by the drug\*\*\* (+1)
- 6. Rechallenge effect:**
  - Reappearance of the positive effect (+3)
  - Negative, the effect does not reappear (−2)
  - No re-exposure or no information (0)
  - Death or irreversible effect (0)
  - Positive for a different agent with the same active ingredient or parent drug according to ATC(+3)
  - Positive for a different agent with confirmed cross reactivity to de culprit drug (+3)
- 7. Prechallenge**
  - Prior IV type hypersensitivity with this drug (+3)
  - No re-exposure or no information (0)
  - Positive prechallenge for a different agent with the same active ingredient or parent drug according to ATC (+3)
  - Positive prechallenge for a different agent with the cross reactivity to de culprit drug (+3)
- 8. Concomitant drug administration:**
  - None or no information (0)
  - Concomitant drug with incompatible time to onset (0)
  - Concomitant drug with evidence for its role in this case as indicated by prospective studies (−1)
  - Concomitant drug moderate evidence for its role in this case as indicated by prospective studies (−2)

- Concomitant drug with strong evidence for its role in this case as indicated by prospective studies (positive rechallenge or validated test) (-3)
- 9. Microbiological evidence of herpes viral reactivation (typically VHH6/7/CMV/EBV in context of drug administration: (+1)**
- 10. Immunoallergy testing:**
- In vitro or in vivo validated test: positive for suspicious/parent drug or active ingredient or metabolites (+3)
  - In vitro or in vivo validated test: Negative (0) or not performed (0)
- 11. Alternative cause\*\*\*\*:**
- If onset can be justified by other clinical entity (-3).
  - If onset cannot be justified by other clinical entity (0).

**SCORE: 0-2 Highly unlikely; 3-4 possible; probable: 5-6; highly probable 7-8; > 9 defined causation.**

(\*) Index day is considered to be the day on which prodromal symptoms / signs occurred, or in their absence, the day of acute rash. (\*\*) Except for NSAIDs and for antibiotics between 3 and 7 days [Um et al. J Investig Allergol Clin Immunol 2010; Vol. 20(7): 556-562 (\*\*\*) Genetic risk factors are available: The HLA Adverse Drug Reaction Database available at <http://www.allele frequencies.net/hla-adr/default.asp>; PharmaGKB Database available at <https://www.pharmgkb.org/>. (\*\*\*\*) there are a number of differential diagnostic considerations, because the clinical manifestations of DRESS can mimic other diseases such as viral primoinfections: they include EBV or CMV-induced infectious mononucleosis (IM), parvovirus B19 infection, measles infection, dengue virus infection, Coxsackie virus infection, Kawasaki disease, and Kikuchi-Fujimoto disease, whose patients may present with fever, skin rashes, lymphadenopathy, and internal organ involvement.  
Abbreviations: ATC, anatomical therapeutic chemical. Similar Drug= same ATC code up to the fourth level (chemical subgroups).

**Table S3. Algorithm of the Spanish Pharmacovigilance System (ASPS) [2s]**

|                                                                                                                                                                                                           |
|-----------------------------------------------------------------------------------------------------------------------------------------------------------------------------------------------------------|
| Algorithm of the Spanish Pharmacovigilance System                                                                                                                                                         |
| <b>1. The chronology referred to as the interval between drug administration and effect :</b>                                                                                                             |
| 1. Compatible (score +2)                                                                                                                                                                                  |
| 2. Not totally compatible (+1)                                                                                                                                                                            |
| 3. No information (0)                                                                                                                                                                                     |
| 4. Incompatible chronology (-1)                                                                                                                                                                           |
| 5. Particular case of syndrome of abstinence (+2).                                                                                                                                                        |
| <b>2. The literature, defining the degree of knowledge of the relationship between the drug and the effect:</b>                                                                                           |
| 1. Known in the literature of reference (+2): collected in Summary of Product Characteristics or in books of reference (Martindale, Meyer's) .                                                            |
| 2. Occasionally known (+1): only found in published cases reports.                                                                                                                                        |
| 3. Unknown (0)                                                                                                                                                                                            |
| 4. There is pharmacological information against relationship between medicine and the adverse effect (-1)                                                                                                 |
| <b>3. The evaluation of drug withdrawal:</b>                                                                                                                                                              |
| 1. Improves with the withdrawal (+2)                                                                                                                                                                      |
| 2. Does not improve with withdrawal (-2)                                                                                                                                                                  |
| 3. No improvement and no withdrawal (+1)                                                                                                                                                                  |
| 4. Improves and there is no withdrawal (-2)                                                                                                                                                               |
| 5. No information (0)                                                                                                                                                                                     |
| 6. Death or irreversible effect (0)                                                                                                                                                                       |
| 7. Improves by development of tolerance, to despite not to withdraw (+1)                                                                                                                                  |
| 8. Improves with symptomatic treatment to despite not to withdraw (+1)                                                                                                                                    |
| <b>4. The rechallenge effect:</b>                                                                                                                                                                         |
| 1. Positive effect reappearance (+3)                                                                                                                                                                      |
| 2. Negative, the effect does not reappear (-1)                                                                                                                                                            |
| 3. No re-exposure or no information (0)                                                                                                                                                                   |
| 4. Death or irreversible effect (0)                                                                                                                                                                       |
| 5. Positive for a different specialty with the same active ingredient or parent drug (+1)                                                                                                                 |
| <b>5. Alternative causes:</b>                                                                                                                                                                             |
| 1. Yes, an illness or other drugs (-3).                                                                                                                                                                   |
| 2. Similar likelihood for drug and other causes (-1)                                                                                                                                                      |
| 3. Missing information (0)                                                                                                                                                                                |
| 4. There is not any alternative cause (+1)                                                                                                                                                                |
| <b>6. Contributing factors:</b>                                                                                                                                                                           |
| 1. Yes (+1).                                                                                                                                                                                              |
| 2. No (0)                                                                                                                                                                                                 |
| <b>7. Complementary explorations:</b>                                                                                                                                                                     |
| 1. Yes (+1).                                                                                                                                                                                              |
| 2. No (0)                                                                                                                                                                                                 |
| <b>Categories according to final SCORE:</b>                                                                                                                                                               |
| <ul style="list-style-type: none"> <li>• Not classified (lack of data)/Improbable: &lt;0</li> <li>• Conditional: 1-3</li> <li>• Possible: 4-5</li> <li>• Probable: 6-7</li> <li>• Defined: ≥ 8</li> </ul> |

## References

**Ref 1s.** Kardaun SH, Sidoroff A, Valeyrie-Allanore L, Halevy S, Davidovici BB, Mockenhaupt M, Roujeau JC. Variability in the clinical pattern of cutaneous side-effects of drugs with systemic symptoms: does a DRESS syndrome really exist? *Br J Dermatol*. 2007 Mar;156(3):609-11. doi: 10.1111/j.1365-2133.2006.07704.x.

**Ref 2s.** Aguirre C, García M. Evaluación de la causalidad en las comunicaciones de reacciones adversas a medicamentos. Algoritmo del Sistema español de Farmacovigilancia [Causality assessment in reports on adverse drug reactions. Algorithm of Spanish pharmacovigilance system]. *Med Clin (Barc)*. 2016 Nov 18;147(10):461-464. Spanish. doi: 10.1016/j.medcli.2016.06.012. Epub 2016 Jul 20.
